# Supplementary material for: Population attributable fractions for risk factors for dementia in low-income and middle-income countries: an analysis using cross-sectional survey data
Source: PubMed Central journal article supplement — Lancet Glob Health. Author manuscript; Available in PMC 2024 Dec 9. (PMC7617123; doi:10.1016/s2214-109x(19)30074-9), 2019-05-01
Supplement: EMS182031-supplement-Appendix.pdf [file EMS182031-supplement-Appendix.pdf]

# THE LANCET

## Global Health

### Supplementary appendix

This appendix formed part of the original submission and has been peer reviewed. We post it as supplied by the authors.

Supplement to: Mukadam N, Sommerlad A, Huntley J, Livingston G. Population attributable fractions for risk factors for dementia in low-income and middle-income countries: an analysis using cross-sectional survey data. *Lancet Glob Health* 2019; 7: e596–603.

|                     | Cuba N=2944 |              | Dominican Republic N=2011 |              | Peru N=1933 |              | Venezuela N=1965 |              | Mexico N=2003 |              | Puerto Rico N=2009 |              |
|---------------------|-------------|--------------|---------------------------|--------------|-------------|--------------|------------------|--------------|---------------|--------------|--------------------|--------------|
| Risk factor         | Prevalence  | Weighted PAF | Prevalence                | Weighted PAF | Prevalence  | Weighted PAF | Prevalence       | Weighted PAF | Prevalence    | Weighted PAF | Prevalence         | Weighted PAF |
| Low education       | 58.2        | 9.8          | 89.6                      | 13.4         | 56.3        | 10.0         | 81.4             | 12.5         | 88.4          | 13.5         | 43.8               | 8.0          |
| Hearing loss        | 23.1        | 6.5          | 19.2                      | 5.7          | 40.5        | 10.6         | 26.2             | 7.3          | 36.4          | 9.6          | 30.5               | 8.2          |
| Hypertension        | 27.1        | 5.3          | 26.3                      | 5.2          | 14.8        | 3.2          | 35.1             | 6.6          | 16.3          | 3.5          | 27.1               | 5.4          |
| Obesity             | 36.4        | 6.8          | 45.7                      | 8.3          | 42.6        | 8.1          | 47.0             | 8.4          | 49.2          | 8.9          | 54.3               | 9.4          |
| Smoking             | 45.0        | 8.1          | 47.8                      | 8.6          | 16.8        | 3.6          | 44.1             | 8.0          | 31.3          | 6.2          | 27.4               | 5.4          |
| Depression          | 32.5        | 8.6          | 21.8                      | 6.3          | 29.8        | 8.4          | 14.9             | 4.5          | 17.1          | 5.2          | 23.3               | 6.6          |
| Social isolation    | 0.1         | 0.02         | 0.2                       | 0.1          | 0.8         | 0.2          | 0.2              | 0.1          | 0.8           | 0.2          | 0.9                | 0.2          |
| Physical inactivity | 32.5        | 4.4          | 36.9                      | 4.9          | 30.6        | 4.3          | 35.0             | 4.7          | 35.1          | 4.8          | 36.1               | 4.8          |
| Diabetes            | 18.0        | 3.1          | 10.3                      | 1.9          | 8.7         | 1.7          | 15.4             | 2.7          | 20.7          | 3.7          | 31.3               | 5.2          |
| Total PAF           |             | 52.7         |                           | 54.3         |             | 50.2         |                  | 54.8         |               | 55.5         |                    | 53.2         |

**Supplementary Table 1: prevalence of risk factors and PAF in individual Latin American countries**

| Risk factor                                               | China                |                  |                       |                  | India                |                  |                       |                  | Latin America        |                  |                       |                  |
|-----------------------------------------------------------|----------------------|------------------|-----------------------|------------------|----------------------|------------------|-----------------------|------------------|----------------------|------------------|-----------------------|------------------|
|                                                           | Lower Prevalence (%) | Weighted PAF (%) | Higher Prevalence (%) | Weighted PAF (%) | Lower Prevalence (%) | Weighted PAF (%) | Higher Prevalence (%) | Weighted PAF (%) | Lower Prevalence (%) | Weighted PAF (%) | Higher Prevalence (%) | Weighted PAF (%) |
| Low education                                             | 68.5 <sup>1</sup>    | 10.5             | 75.9                  | 10.4             | 80.3 <sup>1</sup>    | 12.8             | 92.2                  | 12.6             | 57.0 <sup>1</sup>    | 10.6             | 68.8                  | 10.3             |
| Hearing loss                                              | 4.8 <sup>2</sup>     | 1.5              | 58.9 <sup>3</sup>     | 11.5             | 7.6 <sup>2</sup>     | 2.5              | 25.1 <sup>4</sup>     | 6.5              | 7.3 <sup>2</sup>     | 2.6              | 28.8                  | 7.3              |
| Hypertension                                              | 29.1 <sup>5</sup>    | 5.4              | 35.7 <sup>6</sup>     | 5.8              | 19.3                 | 4.1              | 29.4 <sup>6</sup>     | 5.3              | 39.1 <sup>6</sup>    | 7.9              | 55.6                  | 8.8              |
| Obesity                                                   | 16.1 <sup>7</sup>    | 3.2              | 32.0                  | 5.3              | 13.7                 | 3.0              | 15.0 <sup>8</sup>     | 2.9              | 33.8 <sup>9</sup>    | 7.0              | 44.8                  | 7.5              |
| Smoking                                                   | 23.0                 | 4.4              | 32.9 <sup>10</sup>    | 5.5              | 15.6 <sup>11</sup>   | 3.4              | 33.4                  | 5.9              | 30.0                 | 6.3              | 39.6 <sup>12</sup>    | 6.8              |
| Depression                                                | 1.5                  | 0.5              | 27.0 <sup>13</sup>    | 6.5              | 5.2                  | 1.8              | 5.2                   | 1.6              | 5.2 <sup>14</sup>    | 1.9              | 23.9                  | 6.2              |
| Social isolation                                          | 3.4                  | 0.7              | 3.4                   | 0.7              | 10.4                 | 2.3              | 10.4                  | 2.1              | 0.5                  | 0.1              | 0.5                   | 0.1              |
| Physical inactivity                                       | 28.3 <sup>15</sup>   | 3.7              | 68.2                  | 7.1              | 15.3                 | 2.3              | 54.4 <sup>16</sup>    | 6.3              | 34.2                 | 5.0              | 44.6 <sup>17</sup>    | 5.3              |
| Diabetes                                                  | 4.5 <sup>18</sup>    | 0.8              | 11.6 <sup>19</sup>    | 1.8              | 7.1 <sup>18</sup>    | 1.4              | 9.3                   | 1.6              | 11.0 <sup>18</sup>   | 2.2              | 21.3 <sup>20</sup>    | 3.4              |
| <b>Weighted PAF (% - taking communality into account)</b> | <b>30.7</b>          |                  | <b>54.5</b>           |                  | <b>33.5</b>          |                  | <b>44.7</b>           |                  | <b>43.5</b>          |                  | <b>57.8</b>           |                  |

**Supplementary table 2: Sensitivity analyses for PAF**

1. Barro RJ, Lee JW. A new data set of educational attainment in the world, 1950–2010. *Journal of development economics*. 2013;104:184-98.
2. Organization WH. State of hearing and ear care in the South East Asia Region. WHO Regional Office for South East Asia. WHO-SEARO. SEA/Deaf/9. 2009.
3. Gong R, Hu X, Gong C, Long M, Han R, Zhou L, et al. Hearing loss prevalence and risk factors among older adults in China. *International journal of audiology*. 2018;57(5):354-9.
4. Garg S, Kohli C, Mangla V, Chadha S, Singh MM, Dahiya N. An Epidemiological Study on Burden of Hearing Loss and Its Associated Factors in Delhi, India. *Annals of Otology, Rhinology & Laryngology*. 2018:0003489418781968.
5. Li Z, Fu C, Yang F, Mao Z. Prevalence and risk factors of hypertension for the middle-aged population in China—results from the China Health and Retirement Longitudinal Study (CHARLS). *Clinical and Experimental Hypertension*. 2018:1-7.

6. Sarki AM, Nduka CU, Stranges S, Kandala N-B, Uthman OA. Prevalence of hypertension in low-and middle-income countries: a systematic review and meta-analysis. *Medicine*. 2015;94(50).
7. Wang R, Zhang P, Gao C, Li Z, Lv X, Song Y, et al. Prevalence of overweight and obesity and some associated factors among adult residents of northeast China: a cross-sectional study. *BMJ open*. 2016;6(7):e010828.
8. Zargar A, Masoodi S, Laway B, Khan A, Wani A, Bashir M, et al. Prevalence of obesity in adults--an epidemiological study from Kashmir Valley of Indian Subcontinent. *The Journal of the Association of Physicians of India*. 2000;48(12):1170-4.
9. Lanas F, Bazzano L, Rubinstein A, Calandrelli M, Chen C-S, Elorriaga N, et al. Prevalence, Distributions and Determinants of Obesity and Central Obesity in the Southern Cone of America. *PLoS one*. 2016;11(10):e0163727.
10. Liu S, Zhang M, Yang L, Li Y, Wang L, Huang Z, et al. Prevalence and patterns of tobacco smoking among Chinese adult men and women: findings of the 2010 national smoking survey. *J Epidemiol Community Health*. 2017;71(2):154-61.
11. Jindal S, Aggarwal A, Chaudhry K, Chhabra S, D Souza G, Gupta D, et al. Tobacco smoking in India: prevalence, quit-rates and respiratory morbidity. *Indian Journal of Chest Diseases and Allied Sciences*. 2006;48(1):37.
12. Champagne B, Sebr e E, Schargrodsky H, Pramparo P, Boissonnet C, Wilson E. Tobacco smoking in seven Latin American cities: the CARMELA study. *Tobacco control*. 2010;19(6):457-62.
13. Yunming L, Changsheng C, Haibo T, Wenjun C, Shanhong F, Yan M, et al. Prevalence and risk factors for depression in older people in Xi' an China: a community-based study. *International journal of geriatric psychiatry*. 2012;27(1):31-9.
14. Kessler RC, Birnbaum HG, Shahly V, Bromet E, Hwang I, McLaughlin KA, et al. Age differences in the prevalence and co-morbidity of DSM-IV major depressive episodes: results from the WHO World Mental Health Survey Initiative. *Depression and anxiety*. 2010;27(4):351-64.
15. Sun F, Norman IJ, While AE. Physical activity in older people: a systematic review. *BMC public health*. 2013;13(1):449.
16. Anjana RM, Pradeepa R, Das AK, Deepa M, Bhansali A, Joshi SR, et al. Physical activity and inactivity patterns in India--results from the ICMR-INDIAB study (Phase-1)[ICMR-INDIAB-5]. *International Journal of Behavioral Nutrition and Physical Activity*. 2014;11(1):26.
17. Poggio R, Ser n P, Calandrelli M, Ponzo J, Mores N, Matta MG, et al. Prevalence, patterns, and correlates of physical activity among the adult population in Latin America: cross-sectional results from the CESCAS I study. *Global heart*. 2016;11(1):81-8. e1.
18. Shaw JE, Sicree RA, Zimmet PZ. Global estimates of the prevalence of diabetes for 2010 and 2030. *Diabetes Research and Clinical Practice*. 2010;87(1):January-14.
19. Xu Y, Wang L, He J, Bi Y, Li M, Wang T, et al. Prevalence and control of diabetes in Chinese adults. *Jama*. 2013;310(9):948-59.
20. Barcelo A, Gregg E, Pastor-Valero M, Robles S. Waist circumference, BMI and the prevalence of self-reported diabetes among the elderly of the United States and six cities of Latin America and the Caribbean. *Diabetes Research and Clinical Practice*. 2007;78(3):418-27.
